# Supplementary material for: The Surviving Sepsis Campaign: results of an international guideline-based performance improvement program targeting severe sepsis
Source: Springer Nature journal article supplement (doi:10.1007/s00134-009-1738-3), 2010-01-12
Supplement: MOESM1 [file 134_2009_1738_MOESM1_ESM.pdf]

## Supplemental Figure 1. Severe sepsis screening tool.

\*Chart record – use patient label. Do not remove from chart\*

### Evaluation for Severe Sepsis Screening Tool

**Instructions:** Use this optional tool to screen patients for severe sepsis in the emergency department, on the wards, or in the ICU.

**1. Is the patient's history suggestive of a new infection?**

- |                                                     |                                                         |                                                       |
|-----------------------------------------------------|---------------------------------------------------------|-------------------------------------------------------|
| <input type="checkbox"/> Pneumonia, empyema         | <input type="checkbox"/> Bone/joint infection           | <input type="checkbox"/> Implantable device infection |
| <input type="checkbox"/> Urinary tract infection    | <input type="checkbox"/> Wound infection                | <input type="checkbox"/> Other _____                  |
| <input type="checkbox"/> Acute abdominal infection  | <input type="checkbox"/> Bloodstream catheter infection |                                                       |
| <input type="checkbox"/> Meningitis                 | <input type="checkbox"/> Endocarditis                   |                                                       |
| <input type="checkbox"/> Skin/soft tissue infection |                                                         |                                                       |

\_\_\_ Yes \_\_\_ No

**2. Are any two of following signs & symptoms of infection both present and new to the patient? Note: laboratory values may have been obtained for inpatients but may not be available for outpatients.**

- |                                                            |                                                                                  |                                                                                               |
|------------------------------------------------------------|----------------------------------------------------------------------------------|-----------------------------------------------------------------------------------------------|
| <input type="checkbox"/> Hyperthermia > 38.3 °C (101.0 °F) | <input type="checkbox"/> Tachypnea > 20 bpm                                      | <input type="checkbox"/> Leukopenia (WBC count < 4000 $\mu$ L <sup>-1</sup> )                 |
| <input type="checkbox"/> Hypothermia < 36 °C (96.8 °F)     | <input type="checkbox"/> Acutely altered mental status                           | <input type="checkbox"/> Hyperglycemia (plasma glucose >120 mg/dL) in the absence of diabetes |
| <input type="checkbox"/> Tachycardia > 90 bpm              | <input type="checkbox"/> Leukocytosis (WBC count >12,000 $\mu$ L <sup>-1</sup> ) |                                                                                               |

\_\_\_ Yes \_\_\_ No

If the answer is yes to both either question 1 and 2, *suspicion of infection* is present:

- ✓ Obtain: lactic acid, blood cultures, CBC with differential, basic chemistry labs, bilirubin.
- ✓ At the physician's discretion obtain: UA, chest x-ray, amylase, lipase, ABG, CRP, CT scan.

**3. Are any of the following organ dysfunction criteria present at a site remote from the site of the infection that are not considered to be chronic conditions? Note: the remote site stipulation is waived in the case of bilateral pulmonary infiltrates.**

- SBP < 90 mmHg or MAP < 65 mmHg
- SBP decrease > 40 mm Hg from baseline
- Bilateral pulmonary infiltrates with a new (or increased) oxygen requirement to maintain SpO<sub>2</sub> > 90%
- Bilateral pulmonary infiltrates with PaO<sub>2</sub>/FIO<sub>2</sub> ratio < 300
- Creatinine > 2.0 mg/dl (176.8 mmol/L) or Urine Output < 0.5 ml/kg/hour for > 2 hours
- Bilirubin > 2 mg/dl (34.2 mmol/L)
- Platelet count < 100,000
- Coagulopathy (INR >1.5 or aPTT >60 secs)
- Lactate > 2 mmol/L (18.0 mg/dl)

\_\_\_ Yes \_\_\_ No

If *suspicion of infection* is present AND *organ dysfunction* is present, the patient meets the criteria for SEVERE SEPSIS and should be entered into the severe sepsis protocol.

Date: \_\_\_/\_\_\_/\_\_\_ (circle: dd/mm/yy or mm/dd/yy)

Time: \_\_\_:\_\_\_ (24 hr. clock)

**Supplemental Table 1. Hospitals and networks submitting to SSC database.**

| <b>Hospital</b>                         | <b>City</b>             | <b>Country</b>  |
|-----------------------------------------|-------------------------|-----------------|
| St. Joseph's Regional Medical Center    | Paterson, NJ            | USA             |
| St. Joseph's Hospital Baycare           | Tampa, FL               | USA             |
| Kansas University Hospital              | Kansas City, KS         | USA             |
| St Thomas ICU                           | London                  | UK              |
| Stony Brook University Hospital PICU    | Stony Brook, NY         | USA             |
| Cooper University Hospital              | Camden, NJ              | USA             |
| Hospital Gelderse Vallei                | Ede                     | The Netherlands |
| HIAE                                    | Sao Paulo               | Brazil          |
| Rhode Island Hospital                   | Providence, RI          | USA             |
| The Medical Center of Aurora            | Aurora, IL              | USA             |
| Swedish Medical Center                  | Seattle, WA             | USA             |
| Baptist Medical Center Hospital         | Memphis, TN             | USA             |
| Morton Plant Hospital                   | Clearwater, FL          | USA             |
| UCIP - HGSA                             | Porto                   | Portugal        |
| DSG0001                                 | Jena                    | Germany         |
| H. Univ de Bellvitge                    | Hospitalet de Llobregat | Spain           |
| Memorial Hospital Colorado Springs      | Colorado Springs, CO    | USA             |
| H. PortuguOs                            | Salvador                | Brazil          |
| Nevill Hall Hospital, Abergavenny       | Abergavenny             | Wales           |
| St Lukes Hospital Cedar Rapids          | Cedar Rapids, IA        | USA             |
| H. Sao Paulo                            | Sao Paulo               | Brazil          |
| Presbyterian/St. Lukes Hospital         | Denver, CO              | USA             |
| H.Universitário de Londrina             | Londrina                | Brazil          |
| Good Samaritan Hospital                 | Baltimore, MD           | USA             |
| Exempla Saint Joseph Hospital           | Denver, CO              | USA             |
| Boulder Community Hospital              | Boulder, CO             | USA             |
| Denver Health                           | Denver, CO              | USA             |
| Exempla Lutheran Medical Center         | Wheat Ridge, CO         | USA             |
| Hackensack University Medical Center    | Hackensack, NJ          | USA             |
| Mease Countryside                       | Safety Harbor, FL       | USA             |
| Union Hospital                          | Terre Haute, IN         | USA             |
| Piedmont Hospital                       | Atlanta, GA             | USA             |
| University Hospital, Augusta            | Augusta, GA             | USA             |
| HH-MICU                                 | Houston, TX             | USA             |
| Sentara Norfolk General Hospital        | Norfolk, VA             | USA             |
| Carolinas Medical Center                | Charlotte, SC           | USA             |
| San Giovanni Battista Hospital of Turin | Turin                   | Italy           |
| Altru Hospital                          | Grand Forks, ND         | USA             |
| Banner Desert Medical Center            | Mesa, AZ                | USA             |

## Intensive Care Medicine

|    |                                               |                       |          |
|----|-----------------------------------------------|-----------------------|----------|
| 1  |                                               |                       |          |
| 2  |                                               |                       |          |
| 3  | Georgetown University Hospital                | Washington, DC        | USA      |
| 4  | Sentara VBGH                                  | Virginia Beach, VA    | USA      |
| 5  | UHW                                           | Cardiff               | Wales    |
| 6  | SAH                                           | St. Petersburg, FL    | USA      |
| 7  | Exempla Good Samaritan Hospital               | Lafayette, LA         | USA      |
| 8  | St. Anthony Central                           | Denver, CO            | USA      |
| 9  | FALP                                          | Santiago              | Chile    |
| 10 | Sentara Leigh                                 | Norfolk, VA           | USA      |
| 11 | H. Univ de Girona Josep Trueta                | Girona                | Spain    |
| 12 | Franklin Square Hospital Center               | Baltimore, MD         | USA      |
| 13 | H. Valle Hebron                               | Barcelona             | Spain    |
| 14 | H. Donostia                                   | San Sebastian         | Spain    |
| 15 | H. Virgen de la Macarena                      | Sevilla               | Spain    |
| 16 | Newham University Hospital NHS Trust          | London                | UK       |
| 17 | Good Hope Hospital NHS Trust                  | West Midlands         | UK       |
| 18 | Olathe Medical Center                         | Olathe, KS            | USA      |
| 19 | H. Pro-Cardfaco                               | Rio de Janeiro        | Brazil   |
| 20 | H. Virgen Victoria Málaga                     | Málaga                | Spain    |
| 21 | H. Univ Dr Peset                              | Valencia              | Spain    |
| 22 | Providence AK Med Ctr                         | Anchorage, AK         | USA      |
| 23 | Lakeland Regional Medical Center              | Lakeland, FL          | USA      |
| 24 | North Bay Hospital                            | New Port Ritchie, FL  | USA      |
| 25 | DSG0058                                       | Greifswald            | Germany  |
| 26 | H. Gregorio Marañón                           | Madrid                | Spain    |
| 27 | Hospital Virgen del Rocío                     | Sevilla               | Spain    |
| 28 | Washington Hospital Center                    | Washington, DC        | USA      |
| 29 |                                               |                       | Northern |
| 30 | Craigavon Hospital                            | Craigavon             | Ireland  |
| 31 | Shawnee Mission Medical Center                | Shawnee Mission, KS   | USA      |
| 32 | STH EW1                                       | London                | UKi      |
| 33 | PUC                                           | Santiago              | Chile    |
| 34 | Mease Dunedin                                 | Dunedin, FL           | USA      |
| 35 | H. de Manresa                                 | Manresa               | Spain    |
| 36 | St. Lukes Regional Medical Center, Sioux City | Sioux City, IA        | USA      |
| 37 | H. Son Dureta                                 | Mallorca              | Spain    |
| 38 | H.de Base                                     | Spo JosT do Rio Preto | Brazil   |
| 39 | H. Parc Taull                                 | Sabadell              | Spain    |
| 40 | H. Univ de Salamanca                          | Salamanca             | Spain    |
| 41 | Wyoming Medical Center                        | Casper, WY            | USA      |
| 42 | H. Univ de Valme                              | Sevilla               | Spain    |
| 43 | STH EW2                                       | London                | UK       |
| 44 | Sentara Careplex Hospital Section 3           | Hampton, VA           | USA      |
| 45 | Saint Joseph Medical Center                   | Kansas City, KS       | USA      |
| 46 | Sentara Careplex Hospital Section 2           | Hampton, VA           | USA      |
| 47 | Littleton Adventist Hospital                  | Littleton, CO         | USA      |
| 48 | H. Municipal Spo JosT                         | Joinville             | Brazil   |
| 49 | DSG 0005                                      | Berlin                | Germany  |
| 50 |                                               | Las Palmas de Gran    |          |
| 51 | H. Univ Insular Gran Canaria                  | Canaria               | Spain    |
| 52 | Rose Medical Center                           | Denver, CO            | USA      |
| 53 | Presbyterian Hospital                         | Charlotte, SC         | USA      |
| 54 |                                               |                       |          |
| 55 |                                               |                       |          |
| 56 |                                               |                       |          |
| 57 |                                               |                       |          |
| 58 |                                               |                       |          |
| 59 |                                               |                       |          |
| 60 |                                               |                       |          |

## Intensive Care Medicine

|    |                                      |                      |           |
|----|--------------------------------------|----------------------|-----------|
| 1  |                                      |                      |           |
| 2  |                                      |                      |           |
| 3  | MICU                                 | Houston, TX          | USA       |
| 4  | H. Morales Meseguer                  | Murcia               | Spain     |
| 5  | H. Univ Central Asturias             | Asturias             | Spain     |
| 6  | GBR\RW3MR                            | Manchester           | UK        |
| 7  | West Suburban                        | Oak Park, IL         | USA       |
| 8  | H. Mútua de Terrassa                 | Terrassa             | Spain     |
| 9  | Hospital Austral                     | Pilar                | Argentina |
| 10 | Evanston                             | Evanston, IL         | USA       |
| 11 | H. San Agustin                       | Aviles               | Spain     |
| 12 | H. Reo Ortega                        | Valladolid           | Spain     |
| 13 | Sentara Careplex Hospital Section 1  | Hampton, VA          | USA       |
| 14 | Kettering General Hospital           | Kettering            | UK        |
| 15 | Hospital Univ San Cecilio            | Granada              | Spain     |
| 16 | Union Memorial Hospital              | Baltimore, MD        | USA       |
| 17 | Sentara Bayside Hospital             | Virginia Beach, VA   | USA       |
| 18 | H. General Yague                     | Burgos               | Spain     |
| 19 | H. Juan Ramon Jimenez                | Huelva               | Spain     |
| 20 | DSG0034                              | Emden                | Germany   |
| 21 | Covenant Health System               | Lubbock, TX          | USA       |
| 22 | H. Clfnico Univ de Valladolid        | Valladolid           | Spain     |
| 23 | Hoag Hospital                        | Newport Beach        | USA       |
| 24 | do Servidor Público Estadual de SP   | Spo Paulo            | Brazil    |
| 25 | H. General de Ciudad Real            | Ciudad Real          | Spain     |
| 26 | Stony Brook University Hospital MICU | Stony Brook, NY      | USA       |
| 27 | H. Cabueñes                          | Gijon                | Spain     |
| 28 | Hospital de Clinicas Caracas         | Caracas              | Venezuela |
| 29 | C. Hospitalario Univ Albacete        | Albacete             | Spain     |
| 30 | Azienda Ospedaliera G.Rummo          | Benevento            | Italy     |
| 31 | OSF SAMC - CCC                       | Rockford, IL         | USA       |
| 32 | C. H. UNIMED                         | Joinville            | Brazil    |
| 33 | H. Rfo Carrion                       | Palencia             | Spain     |
| 34 | H. de Leon                           | Leon                 | Spain     |
| 35 | H. de Terrassa                       | Terrassa             | Spain     |
| 36 | Centro Medico Delfos                 | Barcelona            | Spain     |
| 37 | H. de Sagunt                         | Valencia             | Spain     |
| 38 | Stony Brook University Hospital SICU | Stony Brook, NY      | USA       |
| 39 | Allen Memorial Hospital, Waterloo    | Waterloo             | USA       |
| 40 | H. Santa Luzia                       | Brasflia             | Brazil    |
| 41 | Northern Michigan Hospital           | Petoskey, MI         | USA       |
| 42 | St. Marys Health Center              | Richmond Heights, VA | USA       |
| 43 | Highland Park                        | Highland Park, IL    | USA       |
| 44 | H. San Carlos                        | Madrid               | Spain     |
| 45 | Providence Everett Medical Center    | Everett, WA          | USA       |
| 46 | H. Santa Bárbara                     | Soria                | Spain     |
| 47 | H. Clfnico de Valencia               | Valencia             | Spain     |
| 48 | H. Torrecardenas                     | Almerfa              | Spain     |
| 49 | H. La Mancha Centro                  | Ciudad Real          | Spain     |
| 50 | H. General de Mostoles               | Mostoles             | Spain     |
| 51 | DSG0040                              |                      | Germany   |
| 52 | Sky Ridge Medical Center             | Cleveland, TN        | USA       |
| 53 |                                      |                      |           |
| 54 |                                      |                      |           |
| 55 |                                      |                      |           |
| 56 |                                      |                      |           |
| 57 |                                      |                      |           |
| 58 |                                      |                      |           |
| 59 |                                      |                      |           |
| 60 |                                      |                      |           |

## Intensive Care Medicine

|    |                                         |                      |         |
|----|-----------------------------------------|----------------------|---------|
| 1  |                                         |                      |         |
| 2  |                                         |                      |         |
| 3  | Thomas Hospital                         | Fairhope, AL         | USA     |
| 4  | Empresa Pública Hospital de Poniente    | El Ejido             | Spain   |
| 5  | Stony Brook University Hospital         | Stony Brook, NY      | USA     |
| 6  | H. de Matpo                             | Matpo                | Brazil  |
| 7  | H. de Caridade Astrogildo - Santa Maria | Santa Maria          | Brazil  |
| 8  | Harbor Hospital                         | Baltimore, MD        | USA     |
| 9  | UCI HDS                                 | Santiago             | Chile   |
| 10 | Scott & White                           | Temple, TX           | USA     |
| 11 | H. Virgen del Camino                    | Pamplona             | Spain   |
| 12 | 39tos004/rianimazione                   | Pisa                 | Italy   |
| 13 | Sentara Williamsburg Regional M C       | Williamsburg, VA     | USA     |
| 14 | Glenbrook                               | Glenview, IL         | USA     |
| 15 | H. Dona Helena                          | Joinville            | Brazil  |
| 16 | VA Medical Center 01                    |                      | USA     |
| 17 | Royal Berkshire NHS Foundation Trust    | Reading              | UK      |
| 18 | H. General de Segovia                   | Segovia              | Spain   |
| 19 | Penrose Hospital                        | Colorado Springs, CO | USA     |
| 20 | Policlinico Universitario A.Gemelli     | Rome                 | Italy   |
| 21 | H. Vega Baja                            | Orihuela             | Spain   |
| 22 | H. Univ Puerta del Mar                  | Cádiz                | Spain   |
| 23 | H. Nuestra Señora del Prado             | Talavera de la Reina | Spain   |
| 24 | DSG0049                                 | Siegen               | Germany |
| 25 | DSG0003                                 | Berlin               | Germany |
| 26 | Hospital Vivalle                        | Spo JosT dos Campos  | Brazil  |
| 27 | H.Escola da F.de M. de Itajubá          | Itajubá              | Brazil  |
| 28 | Harbor - UCLA MC                        | Torrance, CA         | USA     |
| 29 | St Clare Hospital Franciscan Health     | Tacoma, WA           | USA     |
| 30 |                                         |                      |         |
| 31 |                                         |                      |         |
| 32 |                                         |                      |         |
| 33 |                                         |                      |         |
| 34 |                                         |                      |         |
| 35 |                                         |                      |         |
| 36 |                                         |                      |         |
| 37 |                                         |                      |         |
| 38 |                                         |                      |         |
| 39 |                                         |                      |         |
| 40 |                                         |                      |         |
| 41 |                                         |                      |         |
| 42 |                                         |                      |         |
| 43 |                                         |                      |         |
| 44 |                                         |                      |         |
| 45 |                                         |                      |         |
| 46 |                                         |                      |         |
| 47 |                                         |                      |         |
| 48 |                                         |                      |         |
| 49 |                                         |                      |         |
| 50 |                                         |                      |         |
| 51 |                                         |                      |         |
| 52 |                                         |                      |         |
| 53 |                                         |                      |         |
| 54 |                                         |                      |         |
| 55 |                                         |                      |         |
| 56 |                                         |                      |         |
| 57 |                                         |                      |         |
| 58 |                                         |                      |         |
| 59 |                                         |                      |         |
| 60 |                                         |                      |         |
